# Supplementary material for: Testosterone in men with hypogonadism and transgender males: a systematic review comparing three different preparations
Source: PubMed Central journal article supplement — Endocr Connect. 2022 Jun 27;11(8):e220112. doi: 10.1530/EC-22-0112 (PMC9346330; doi:10.1530/ec-22-0112), 2022-06-27
Supplement: supplementary_material.pdf [file supplementary_material.pdf]

## Supplementary Data

### SEARCH STRATEGY

#### PUBMED

##### Hypogonadal men:

((("Hypogonadism"[Majr] OR hypogonad\*[ti] OR Klinefelter[ti] OR ((hypo[ti] OR deficien\*[ti]) AND gonadal[ti]) AND ("men"[mesh] OR man[tw] OR men[tw] OR male[tw] OR males[tw]) AND ("Testosterone/administration and dosage"[Majr] OR "Testosterone/therapeutic use"[Majr] OR "Testosterone/therapy"[Majr] OR "Testosterone Propionate"[majr] OR Sustanon\*[ti] OR AndroGel\*[ti] OR Testim[ti] OR Testavan\*[ti] OR Tostran\*[ti] OR "testosterone undecanoate"[Supplementary Concept] OR "testosterone undecanoate"[ti] OR "Testosterone Propionat\*[ti] OR "testosterone enanthate" [Supplementary Concept] OR "testosterone enanthat\*[ti] OR Nebido[ti] OR Testogel\*[ti] OR "Chorionic Gonadotropin/administration and dosage"[Majr] OR "Chorionic Gonadotropin/drug effects"[Majr] OR "Chorionic Gonadotropin/therapeutic use"[Majr] OR Pregnyl[ti] OR "testosterone cypionat\*[ti] OR "Androgens/administration and dosage"[Majr] OR "Androgens/therapeutic use"[Majr] OR "HCG suppl\*[tw] OR "HCG inject\*[tw] OR "Chorionic Gonadotropin suppl\*[tw] OR "Chorionic Gonadotropin inject\*[tw] OR ((testosteron\*[ti] OR androgen\*[ti] OR "Chorionic gonadotropin\*[ti] OR HCG[ti]) AND (therap\*[ti] OR treat\*[ti] OR suppl\*[ti] OR gel[ti] OR gels[ti] OR inject\*[ti] OR intramusc\*[ti]))) AND (((("clinical trial"[pt] OR "clinical trial"[tiab] OR "clinical trials as topic"[mesh] OR "clinical trials"[tiab] OR "control groups"[mesh] OR "control group"[tiab] OR "control groups"[tiab] OR "controlled clinical trial"[pt] OR "controlled clinical trials as topic"[mesh] OR "cross-over studies"[mesh] OR "cross over study"[tiab] OR "cross over studies"[tiab] OR "double-blind method"[mesh] OR "double blind"[tiab] OR "evaluation studies as topic"[mesh] OR "follow-up studies"[mesh] OR "follow up study"[tiab] OR "follow up studies"[tiab] OR "placebos"[mesh] OR placebo\*[tiab] OR placebos\*[tiab] OR "pragmatic clinical trial"[pt] OR "prospective trial"[ti] OR "prospective studies"[mesh] OR "prospective study"[tiab] OR "prospective studies"[tiab] OR "RaCT"[tiab] OR "RaCTs"[tiab] OR "random allocation"[mesh] OR "randomised "[tiab] OR "randomized controlled trial"[pt] OR "randomized controlled trials as topic"[mesh] OR "randomized"[tiab] OR random\*[tiab] OR "RCT"[tiab] OR "RCTs"[tiab] OR "Research Design"[MeSH:noexp] OR "Research design"[tiab] OR "Research designs"[tiab] OR "single blind"[tiab]

OR "single-blind method"[mesh] OR ((single\*[tiab] OR double\*[tiab] OR triple\*[tiab]) AND (blind\*[tiab] OR mask\*[tiab])) OR volunteer\*[tiab] OR "trial"[ti] OR "trials"[ti])) NOT ("child"[majr] OR child\*[ti] OR peditr\*[ti] OR paediatr\*[ti] OR female\*[tw] OR woman[tw] OR women[tw] OR "older"[ti] OR "elder"\*[ti] OR "aged"[majr] OR rat[ti] OR rats[ti] OR mouse[ti] OR mice[ti] OR rodent\*[ti] OR "neoplasms"[majr] OR "Prostatic Neoplasms"[Mesh] OR "prostat"\*[ti] OR neoplas\*[ti] OR metastas\*[ti] OR metastatic[ti] OR cancer\*[ti] OR tumor\*[ti] OR tumour\*[ti] OR malignanc\*[ti] OR carcino\*[ti] OR cyst[ti] OR cysts[ti] OR lesion\*[ti] OR ("animals"[mesh] NOT "humans"[mesh]))

468 (3-2-2021)

### **Transgender men:**

("Transgender Persons"[Mesh] OR transgend\*[tw] OR "trans gen\*[tw] OR "Transsexualism"[Mesh] OR "Gender Identity"[Mesh] OR "gender identit\*[tw] OR "Gender Dysphoria"[Mesh] OR "gender dysphoria"\*[tw] OR "transmen"[tw] OR "Female to male"[tw] OR "female-to-male"[tw] OR "FtM"[tw] OR "FtMs"[tw] OR transsexual\*[tw] OR "trans sexual"\*[tw] OR "Sex Reassignment Procedures"[Mesh] OR "Sex Reassignment Surgery"[Mesh] OR "sex reassignment"\*[tw] OR "gender chang\*[tw] OR "sex chang\*[tw] OR "sex inversion"\*[tw] OR "sex reversal"\*[tw] OR "sex alteration"\*[tw] OR "sex conversion"\*[tw] OR "sex transformation"\*[tw] AND ("Testosterone/administration and dosage"[Majr] OR "Testosterone/therapeutic use"[Majr] OR "Testosterone/therapy"[Majr] OR "Testosterone Propionate"[majr] OR Sustanon\*[ti] OR AndroGel\*[ti] OR Testim[ti] OR "testosterone undecanoate"[Supplementary Concept] OR "testosterone undecanoate"[tiab] OR "undecanoate"[tiab] OR undecan\*[tiab] OR "Testosterone Propionat\*[ti] OR "testosterone enanthate" [Supplementary Concept] OR "testosterone enanthat\*[ti] OR Nebido[ti] OR Testogel\*[ti] OR "testosterone cypionat\*[ti] OR "Androgens/administration and dosage"[Majr] OR "Androgens/therapeutic use"[Majr] OR ((testosteron\*[ti] OR androgen\*[ti]) AND (therap\*[ti] OR treat\*[ti] OR suppl\*[ti] OR gel[ti] OR gels[ti] OR inject\*[ti] OR intramusc\*[ti]))) NOT (rat[ti] OR rats[ti] OR mouse[ti] OR mice[ti] OR rodent\*[ti] OR ("animals"[mesh] NOT "humans"[mesh])))

223 (17-2-2021)

### **COCHRANE**

### **Hypogonadal men:**

(hypogonad\* OR Klinefelter OR ((hypo OR deficien\*) AND gonadal)) AND (man OR men OR male OR males) AND ( Sustanon\* OR AndroGel\* OR Testim OR Testavan\* OR Tostran\* OR "testosterone undecanoate" OR "Testosterone Propionat\*" OR "testosterone enanthat\*" OR Nebido OR Testogel\* OR Pregnyl OR "testosterone cypionat\*" OR "HCG suppl\*" OR "HCG inject\*" OR "Chorionic Gonadotropin suppl\*" OR "Chorionic Gonadotropin inject\*" OR ((testosteron\* OR androgen\* OR "Chorionic gonadotropin\*" OR HCG) AND (therap\* OR treat\* OR suppl\* OR gel OR gels OR inject\* OR intramusc\*))) NOT ( child\* OR pediater\* OR paediatr\* OR female\* OR woman OR women OR "older" OR "elder\*" OR rat OR rats OR mouse OR mice OR rodent\* OR "prostat\*" OR neoplas\* OR metastas\* OR metastatic OR cancer\* OR tumor\* OR tumour\* OR malignanc\* OR carcino\* OR cyst OR cysts OR lesion\*)

### **Transgender men:**

(transgend\* OR "trans gend\*" OR "gender identit\*" OR "gender dysphoria\*" OR "Female to male" OR "FtM" OR transsexual\* OR "trans sexual\*" OR "sex reassignment\*" OR "gender chang\*" OR "sex chang\*" OR "sex inversion\*" OR "sex reversal\*" OR "sex alteration\*" OR "sex conversion\*" OR "sex transformation\*") AND (Sustanon\* OR AndroGel\* OR Testim OR Testavan\* OR Tostran\* OR "testosterone undecanoate" OR "Testosterone Propionat\*" OR "testosterone enanthat\*" OR Nebido OR Testogel\* OR "testosterone cypionat\*" OR ((testosteron\* OR androgen\*) AND (therap\* OR treat\* OR suppl\* OR gel OR gels OR inject\* OR intramusc\*)))
